# Supplementary material for: Specific residues in the cytoplasmic domain modulate photocurrent kinetics of channelrhodopsin from Klebsormidium nitens
Source: PubMed Central journal article supplement (PMC7902849; doi:10.1038/s42003-021-01755-5), 2021-02-23
Supplement: 42003_2021_1755_MOESM2_ESM.pdf [file 42003_2021_1755_MOESM2_ESM.pdf]

## Supplementary information

### Specific residues in the cytoplasmic domain modulate photocurrent kinetics of channelrhodopsin from *Klebsormidium nitens*

#### Authors

Rintaro Tashiro<sup>1</sup>, Kumari Sushmita<sup>2</sup>, Shoko Hososhima<sup>1</sup>, Sunita Sharma<sup>2</sup>, Suneel Kateriya<sup>2</sup>, Hideki Kandori<sup>1</sup>, Satoshi P. Tsunoda<sup>1</sup>

#### Affiliations

Department of Life Science and Applied Chemistry, Nagoya Institute of Technology, Showa-ku, Nagoya 466-8555, Japan.

Laboratory of Optobiology, School of Biotechnology, Jawaharlal Nehru University, New Delhi, 110067, India

#### Corresponding author

Satoshi Tsunoda email: [tsunoda.satoshi@nitech.ac.jp](mailto:tsunoda.satoshi@nitech.ac.jp)

- Supplementary Figures 1-9
- Supplementary Tables 1-4

|        |     |                                                                  |     |
|--------|-----|------------------------------------------------------------------|-----|
| BR     | 1   | -----QAQITGR                                                     | 7   |
| CrChR2 | 1   | --MDYGGALSAVGRELLFVFNPPVVVNG-SVLVPEDCQYCAGWIESRGT--NGAQTASN      | 54  |
| PsChR  | 1   | -----MGFQLNPEYLNE-TILLDD---CTPIYLVNVP--LWEQKVARG                 | 37  |
| KnChR  | 1   | MTVDAHSTVDA-----HSTVTDH-SAGNGTESCVAFLGMHHSHEGALYSVYKS            | 51  |
| GtCCR4 | 1   | -----MTTSAPSLSDPNWQYGMGGWNNPRLPNFNL-HDPTVIG                      | 37  |
| <hr/>  |     |                                                                  |     |
|        |     |                                                                  |     |
| BR     | 8   | PEWIWALGALMGLGLTYFLVFKMGVSDPAKIFYAITTLVP-----AIAFTMYLSM          | 60  |
| CrChR2 | 55  | LOWLAAG-----PSILLMFYAYOTWKTSCGWEEIYVCAIEMV-----KVILEFFFEF        | 102 |
| PsChR  | 38  | TCWFGVI-----LSLAFLIYYIQQYKATCWEELYVCTIEFC-----KIVILELYFEF        | 85  |
| KnChR  | 52  | LEWGCFL-----ISIGLFVFLYLVITRKTAGWEVVIYIAFIESE-----KYIFEIFWPH      | 99  |
| GtCCR4 | 38  | VWNLGFL--CLLGLASLALMYKLMSPFKGPD-DQEFFVGYREERCLSIYVNLIAAITWGR     | 94  |
| <hr/>  |     |                                                                  |     |
|        |     |                                                                  |     |
| BR     | 61  | LLGYGLTMVPPFGGEQNPIYWARVADWLFITLLELLDALLVDADQG---TIALVGDGI       | 117 |
| CrChR2 | 103 | ---KNPSMLYL-ATGHRVQWLRVYAEWLLTCEVILIHNSNLTGLSNDSRRTMGLLVS DIG    | 158 |
| PsChR  | 86  | ---SPAMIYQ-TNGEVPWLRVYAEWLLTCEVILIHNSNITGLNDDYSGRTMSLITSDLG      | 146 |
| KnChR  | 100 | ---NNPAQLNIYGVNKSVPVWVRYVMEWMITCEVILMAISNISGEEGYTHRSMLLATDQG     | 151 |
| GtCCR4 | 95  | IC---AHFNNDMGLSLSVNYPKLYLIEFTCEIITLDELWLSNLPYKITYSLFV---GL       | 146 |
| <hr/>  |     |                                                                  |     |
|        |     |                                                                  |     |
| BR     | 118 | MGTGLVGLTKVYSYRFVWNAI STAAMLYILYVLFPGFTSKAESM--RP--EVASTFKV      | 173 |
| CrChR2 | 159 | TIWVGATSAM---ATGYVKVIFPCLGCGANTFFHAARAYIEGYHTVPKGRCRQVVTG        | 214 |
| PsChR  | 142 | GLCMVVTSALE---SKGWLKWLFEVIGCCYGASTFYHAALIYIESYTTPHGVCKNMVLA      | 197 |
| KnChR  | 157 | AALCAITAAA---SEGALSAVFYAIGVCYGITFYFCLOIYIEAYFTLE-TCHSAVKW        | 211 |
| GtCCR4 | 147 | TEACGVFCNAF-EPPARYLWFMGECFIFAFETWISILRLVYARFQOPLNEDAKKIRAPLKL    | 205 |
| <hr/>  |     |                                                                  |     |
|        |     |                                                                  |     |
| BR     | 174 | LRNVTVLMSAYPVVWVLIIGSEGAGIVPLNIE TLTFMVLVSAVVGFLILLRRAIFGEA      | 233 |
| CrChR2 | 215 | MAWLFVVSNGMFEILFPLGPEGFVLSVYGSTVGHTEIDLMSNCGWLLGHYLRVLIHEH       | 274 |
| PsChR  | 198 | MAAVFETSWMFEPGLFLAGPEGTNALS WAGSTIGHTVADLLSNANGMIGHFLRLIHKH      | 257 |
| KnChR  | 212 | MAVIFYAGWLCYCFEFLAGSEGWGNLSYEGSAIGHCTADLLSNANGVMHWIRCOLEEY       | 271 |
| GtCCR4 | 206 | SLTLYFSINCGYPAWLLTE--FGALSQLAHVMTVIMVVAASVYGFALLKPOLGVDKR        | 263 |
| <hr/>  |     |                                                                  |     |
| BR     | 234 | EAP-----EP---SAGDGAATS D-----                                    | 249 |
| CrChR2 | 275 | ILIHG-----D-----                                                 | 280 |
| PsChR  | 258 | ILIHG-----DVRRIPI---TVNT-----LGREVTVSCEFVDKE-EED                 | 289 |
| KnChR  | 272 | KETHN-----GQLPHY---SLETRAKMRAEAGHIIAGSLGSLVHVAGOH-----           | 313 |
| GtCCR4 | 264 | DVWLDLDELKSVRYRDPVVPQIRPSKTRRESR-MEYSEDGDFMRPSKGRRAEGDYMNPRWDHHD | 322 |
| <hr/>  |     |                                                                  |     |
| BR     | 250 | -----                                                            | 249 |
| CrChR2 | 281 | -----                                                            | 280 |
| PsChR  | 290 | EDERISTRKYANRASFMKMRNDMEQRGIQTRKS-LE---MLAPPPALNDGSIV-LA---      | 340 |
| KnChR  | 314 | -----HHFHFDEDSMGOGAQIQGQPLAQANERANLKASLLNGNAVNAYNQAV             | 359 |
| GtCCR4 | 323 | DGRRLPDS-----REMDEQVHEKDKQEIS-STMKQIADLNKQLSAMQESBAV-----        | 367 |
| <hr/>  |     |                                                                  |     |
| BR     | 250 | -----                                                            | 249 |
| CrChR2 | 281 | -----                                                            | 280 |
| PsChR  | 341 | VADPMTLTFPTQQLSQ-LDATIRATPAMGQGLEQVLEKGGFDGVLVSP EYIQVGLVQ-      | 398 |
| KnChR  | 360 | QAQPQAFQIQSGEDGYVISMNQGESASGSRRTTQNTIEGP--RKDPVASAFSKALGSMKS     | 417 |
| GtCCR4 | 368 | -----                                                            | 367 |
| <hr/>  |     |                                                                  |     |
| BR     | 250 | -----                                                            | 249 |
| CrChR2 | 281 | -----                                                            | 280 |
| PsChR  | 399 | RLKDRKYHMPVYAFGWGKSSPWRSVIEGSGVDCWLEGPYFGSTFDTDALSDAIAEMQRIKT    | 458 |
| KnChR  | 418 | KVTEHFTKDLPPS-ARPDSPSRGRSARGGADAPTAQPQSMKIDLRD---LANNPQLQQ       | 472 |
| GtCCR4 | 368 | -----                                                            | 367 |
| <hr/>  |     |                                                                  |     |
|        |     |                                                                  |     |
| BR     | 250 | -----                                                            | 249 |
| CrChR2 | 281 | -----                                                            | 280 |
| PsChR  | 459 | SYSMVVNGVGMNAGAMN---GVGMN---GMGMDGVGMNAGAMNAGMNGMGGYGSVG         | 509 |
| KnChR  | 473 | QLSMMLKGQMGAGGYALKTDLKDLANNPQLQQLSMMLKGQMGAGNSNTN-----QGSNN      | 526 |
| GtCCR4 | 368 | -----                                                            | 367 |
| <hr/>  |     |                                                                  |     |
| BR     | 250 | -----                                                            | 249 |
| CrChR2 | 281 | -----                                                            | 280 |
| PsChR  | 510 | NNMHSPMMSQ---QAVM-MPQSA---PQMMGMSQTQPAMMGGMQGASPHYVGNLQNM        | 563 |
| KnChR  | 527 | GSPRARPVSELAQPARLQKAQSA RATSNLDDIEEQAPAQMSRRPSA---RVPRAT--       | 580 |
| GtCCR4 | 368 | -----                                                            | 367 |
| <hr/>  |     |                                                                  |     |
| BR     | 250 | -----                                                            | 249 |
| CrChR2 | 281 | -----                                                            | 280 |
| PsChR  | 564 | EQQQAVGSPQVLASSWOQSALHGGMQQQQYGVQVQMPMMVGMQTPAS---PGGVQTPPH      | 620 |
| KnChR  | 581 | ---AAADEEQAPARTLSRKRISRGDGGEPVSEERLQKRPSYRAAKAAAEAADEDMTDAPAP    | 637 |
| GtCCR4 | 368 | -----                                                            | 367 |
| <hr/>  |     |                                                                  |     |
| BR     | 250 | -----                                                            | 249 |
| CrChR2 | 281 | -----                                                            | 280 |
| PsChR  | 621 | TMAGQPOMSPQOLOQLYFMQOLOQROLOQ---                                 | 650 |
| KnChR  | 638 | ALARRPSARAPAADADE-ETAPVRTASLRRAGSKSPGNSLPSSPSSRRVSRANSLRAPVSA    | 696 |
| GtCCR4 | 368 | -----                                                            | 367 |
| <hr/>  |     |                                                                  |     |
| BR     | 250 | -----                                                            | 249 |
| CrChR2 | 281 | -----                                                            | 280 |
| PsChR  | 651 | ---QQYGGTGQR---                                                  | 660 |
| KnChR  | 697 | SVLLCDADGDMGDFFLDQFAAVPNSKCSVKVATPDELDALATGRAYDFVMVPKGVITS       | 756 |
| GtCCR4 | 368 | -----                                                            | 367 |
| <hr/>  |     |                                                                  |     |
| BR     | 250 | -----                                                            | 249 |
| CrChR2 | 281 | -----                                                            | 280 |
| PsChR  | 661 | -----                                                            | 660 |
| KnChR  | 757 | DPEISEEIRAHQATPLVAFGPALGMAVAEYKAHMFELVDDYIGLTKRGEYFVEDLEA        | 816 |
| GtCCR4 | 368 | -----                                                            | 367 |
| <hr/>  |     |                                                                  |     |
| BR     | 250 | -----                                                            | 249 |
| CrChR2 | 281 | -----                                                            | 280 |
| PsChR  | 661 | -----                                                            | 660 |
| KnChR  | 817 | LWVKYKKVADDSNKD                                                  | 831 |
| GtCCR4 | 368 | -----                                                            | 367 |

**Supplementary Figure 1.**  
**Full amino acid alignments of bacteriorhodopsin (BR), CrChR2, KnChR and GtCCR4**  
 The transmembrane region was shown based on the membrane topology of CrChR2. Putative FimV domain in KnChR was indicated.

|            |     |                                                                 |     |
|------------|-----|-----------------------------------------------------------------|-----|
| FimV       | 1   | MVRLRLTVRAIAAASVLTSGMAHGLGLGEITLKSALNQPLDAEIEELLEVRDLGSGEVIPS   | 60  |
| KnChR-FimV | 1   | -----KALG-----                                                  | 4   |
|            |     | : **                                                            |     |
| FimV       | 61  | LASPEEFKAGVDRLYYLTDLKFTPVVVKPNGKSVIRVTSSKPVQEPYLNFLVQVLWPNGR    | 120 |
| KnChR-FimV | 5   | -----SMKSK-----                                                 | 9   |
|            |     | : : :                                                           |     |
| FimV       | 121 | LLREYTVLLDEPLYSPQAAAAPQAEVVSAPRATGAPRAQCAPAPVRTTAPAGSDTYRTVS    | 180 |
| KnChR-FimV | 10  | VTEHFTKDLPE-S-----ARPDSESRRGSRGGADAPTA-----Q                    | 43  |
|            |     | : . . : * * * : * : * : * * . * * * .                           |     |
| FimV       | 181 | NTLWEIAQRNRTDRVSPQAMLAFOELNPGAFVDGNINRLKSGOVLRIETPEOQMLERSP     | 240 |
| KnChR-FimV | 44  | PQOSMKIDLRDLA---NNPQLOOQLSMLKQOMAGGYALKTDLKDLANNPQLOOQLSMM-     | 99  |
|            |     | : : * * : : . ** : : * . . * : . : : * ** *                     |     |
| FimV       | 241 | REALSQVQAQNSWRGSRNPAAGSAGARQLDATQRNAAGSAPSKVDATDNLRLVSGEGKA     | 300 |
| KnChR-FimV | 100 | -----LKG-----GOMGA-----GNSMT                                    | 111 |
|            |     | : * * * : * * * : * : : *                                       |     |
| FimV       | 301 | SKGADKGGKGDASKAIADTLAVTKESL-DSTRRENEELQSRMODL-QSQLD-----KIQQL   | 353 |
| KnChR-FimV | 112 | NOGSNNGSP-RARPVSEELAQPARLQKAQASARATSNLDEIEEQAPAQMSRRPSARVPA     | 170 |
|            |     | : * : : * . : : : * * . : * * * : : : * : : : * : : : * : : :   |     |
| FimV       | 354 | IQLK---DAQLAKLQGLGAEQOGAA-QPNAALPD---ASQPNAQAQAPAPQPTPAAAP      | 406 |
| KnChR-FimV | 171 | TAAADEEQAPARTLSRKIS-RGDGCEPVSEERLQKRPSYRAAKAAAEAA---DEDMTDAP    | 226 |
|            |     | : * . * . : : . * : * . : * * : * * : * * : * * : * * :         |     |
| FimV       | 407 | TPA---PAGEAPAAPAQPPVAPP---APAAEKPPAPAVPAPAPVQAAEQPAPSFIDE       | 458 |
| KnChR-FimV | 227 | APALARRPSARAPAADADEETAPVRTASLRRRGSKSPGNSLPSSPSRRV-----          | 275 |
|            |     | : * * : * * * * * : * * : * * : * * : * * : * * : * * : * * :   |     |
|            |     | ← Transmembrane region →                                        |     |
| FimV       | 459 | LLANPLWLAVIGGSALLALLVLLMILSRRNAQKEKEEAQAFADTGEEQEDALDLGKDG      | 518 |
| KnChR-FimV | 276 | SRANSL-----                                                     | 281 |
|            |     | * * *                                                           |     |
| FimV       | 519 | DDLTLDEPEPQVAAPQVEKTTAQTSDALGEADIYIAYGRFNQAAELLQNAIYDEPORT      | 578 |
| KnChR-FimV | 282 | -----                                                           | 281 |
| FimV       | 579 | DLRLKLMVEVYAEEMGDREGFARQENELREIGGAQPQVEQLKSRYPAMVAVAAVAGLAGAKL  | 638 |
| KnChR-FimV | 282 | -----                                                           | 281 |
| FimV       | 639 | AQDELDSFSLDLSLDDSGHAAKPDAAAGQDLDDAFDLSLDDLGGDDVQADLKS DSGALDD   | 698 |
| KnChR-FimV | 282 | -----                                                           | 281 |
| FimV       | 699 | LTLSDLDLAASTPADKPVDDLDFGLDFAELAETPSQPKHDDLGDGFSLDDLAPEDKLSDD    | 758 |
| KnChR-FimV | 282 | -----                                                           | 281 |
| FimV       | 759 | DFLLSLNDEVPAAPADNEFTLDEAAEPPALSLPDDFDLSLADEPTEPAAPEKGEDSFA      | 818 |
| KnChR-FimV | 282 | -----                                                           | 281 |
| FimV       | 819 | AQLDEVSAQLDELASNLDPEPKSATPSFSAEDA AVASALDGDADDDFD FSPVPTKRRPSWI | 878 |
| KnChR-FimV | 282 | -----                                                           | 281 |
| FimV       | 879 | WLAPTSTWAIAKARAISSSTKSWPKVMTASRRKPA SCWSAWPDPEMKRPS             | 927 |
| KnChR-FimV | 282 | -----                                                           | 281 |

**Supplementary Figure 2. Full amino acid alignments of FimV from *Pseudomonas aeruginosa* and KnChR. Transmembrane region is indicated.**

a Peak

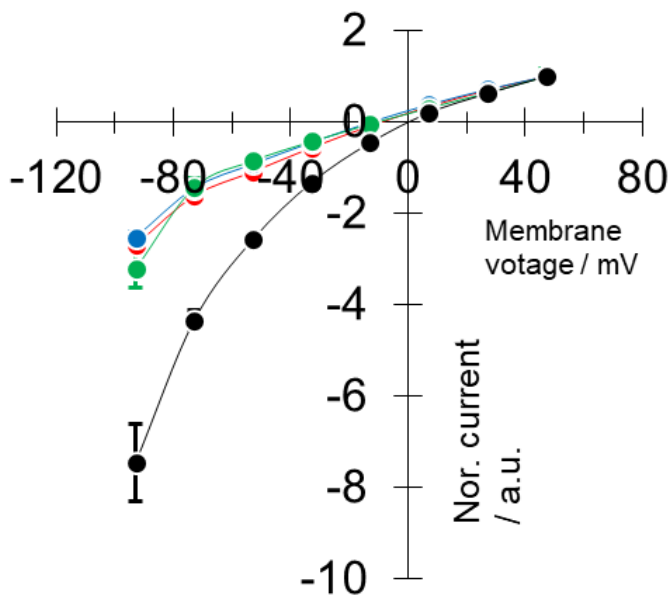

b Steady state

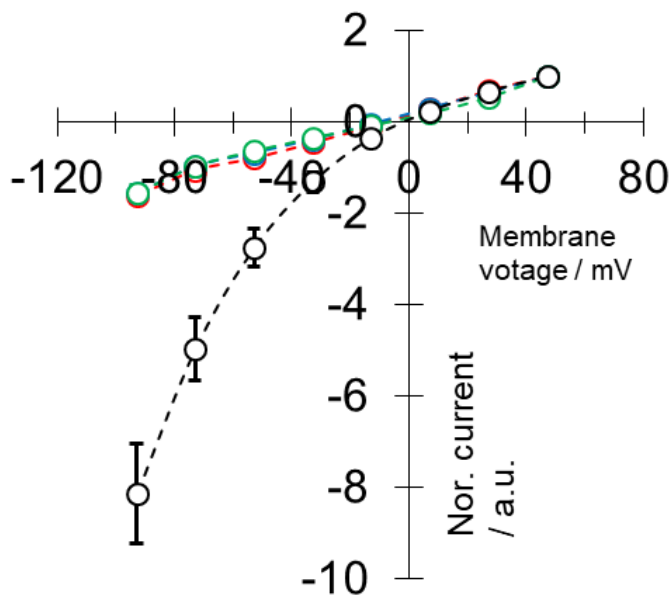

**Supplementary Figure 3. I-V relationship of KnChR and CrChR2.**

Photocurrent amplitude from each variant and CrChR2 is normalized (at +50 mV as 1.0). Filled (a) and empty (b) symbols indicate peak ( $I_p$ ) and steady-current ( $I_s$ ), respectively. Red: KnChR-272 ( $N=7$ ), Blue: KnChR-290 ( $N=7$ ), Green: KnChR-397 ( $N=9$ ), Black: CrChR2 ( $N=6$ ). Standard solutions were used (See *Materials and Methods*). Data were presented as the mean  $\pm$  SEM.

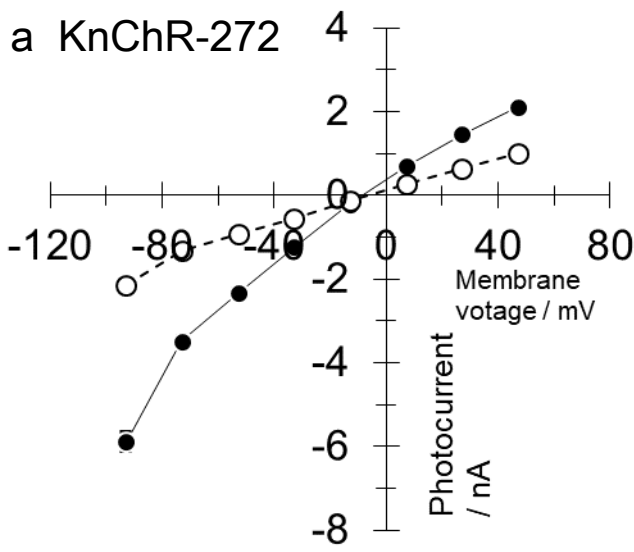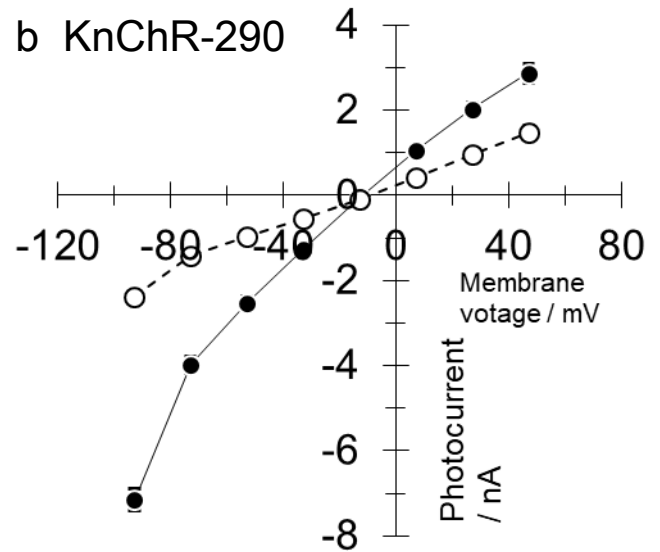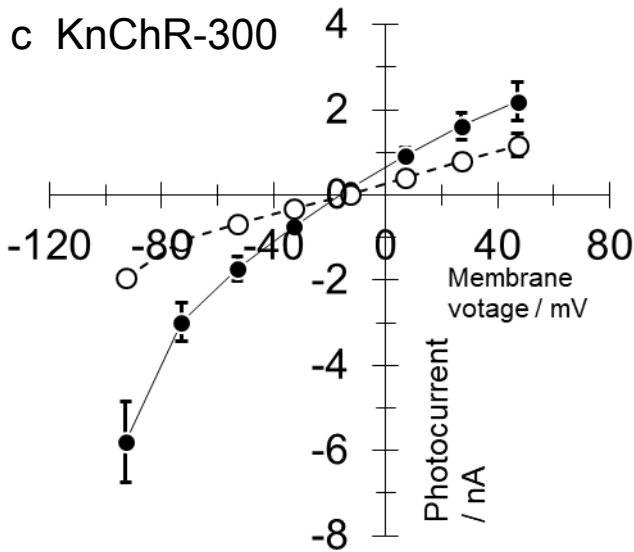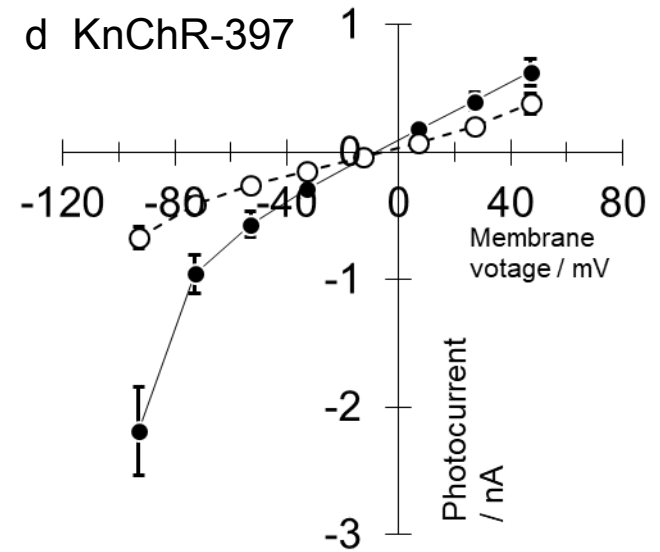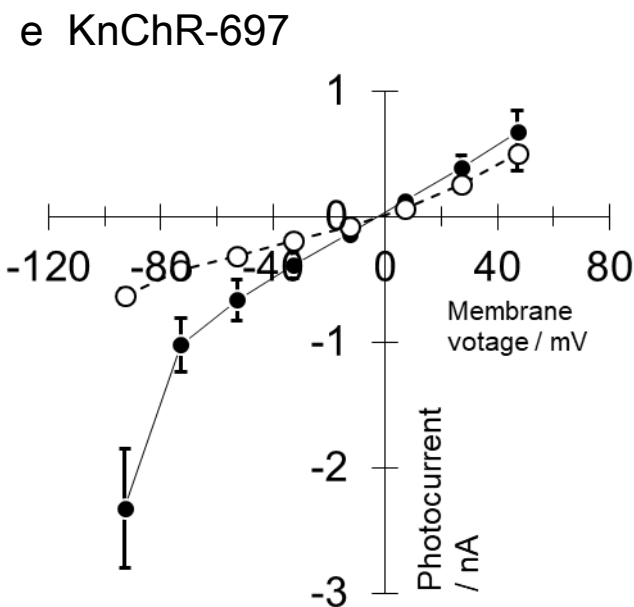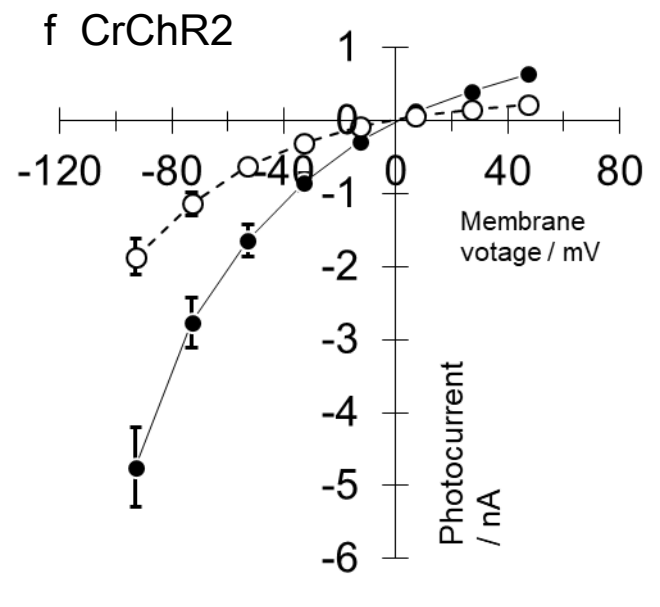

**Supplementary Figure 4. I-V relationship of C-terminus length variants of KnChR and CrChR2.** Amino acid length of KnChR variants is indicated on each panel (a-e). f. CrChR2. Filled circle, a peak component of the photocurrent ( $I_p$ ). Empty circle, a steady-state component of the photocurrent ( $I_s$ ). Standard solutions were used (See *Materials and Methods*). Data were presented as the mean  $\pm$  SEM with  $N = 6$  (panel c and f), 7 (panels a, b and e), 9 (panel d).

a KnChR-397

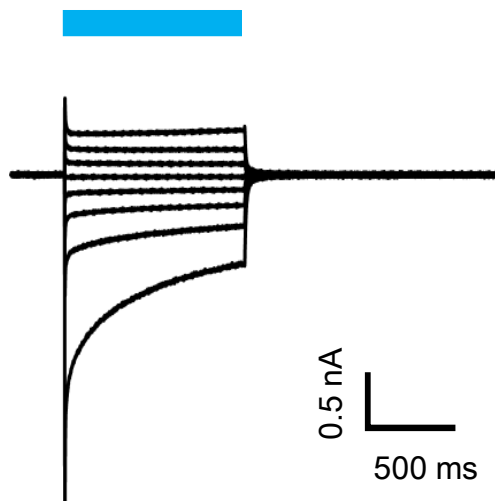

b KnChR-697

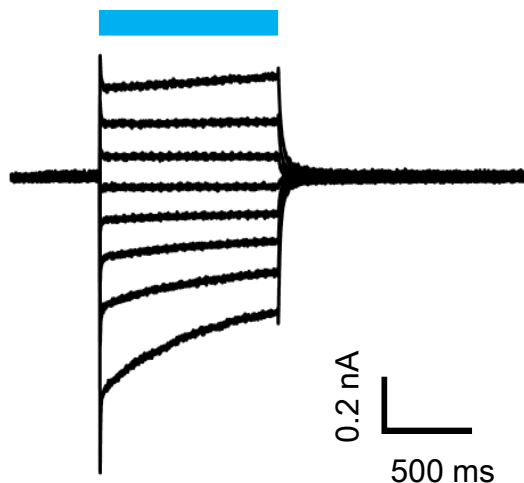

c

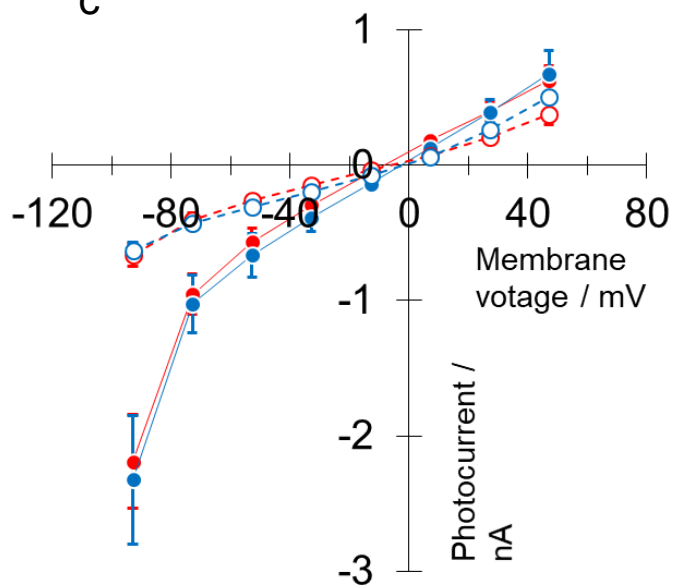

d

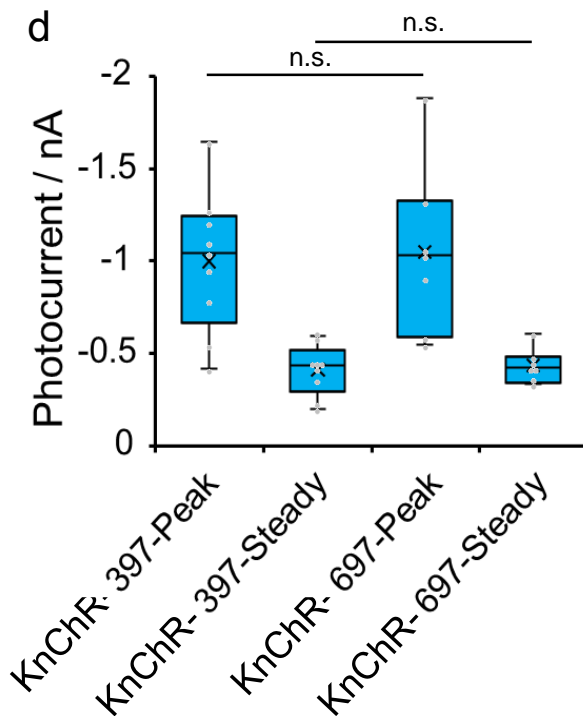

**Supplementary Figure 5. Comparison of the length variants KnChR-397 and KnChR-697.** Typical photocurrent traces of KnChR-397 amino acids (a) and KnChR-697 amino acids (b). Blue bars indicate light application (480 nm, 12.3 mW/mm<sup>2</sup>). Membrane voltage was clamped from at -90 to +50 mV by 20 mV steps. Standard solutions were used (See *Materials and Methods*). c, I-V relationship of KnChR-397 (red) and KnChR-697 (blue). Peak component (filled circle) and steady-state component (empty circle) of the photocurrent were depicted. d, Photocurrent amplitudes at -70 mV were shown. Data were presented as the mean  $\pm$  SEM with  $N=9$  (KnChR-397), and 7 (KnChR-697).

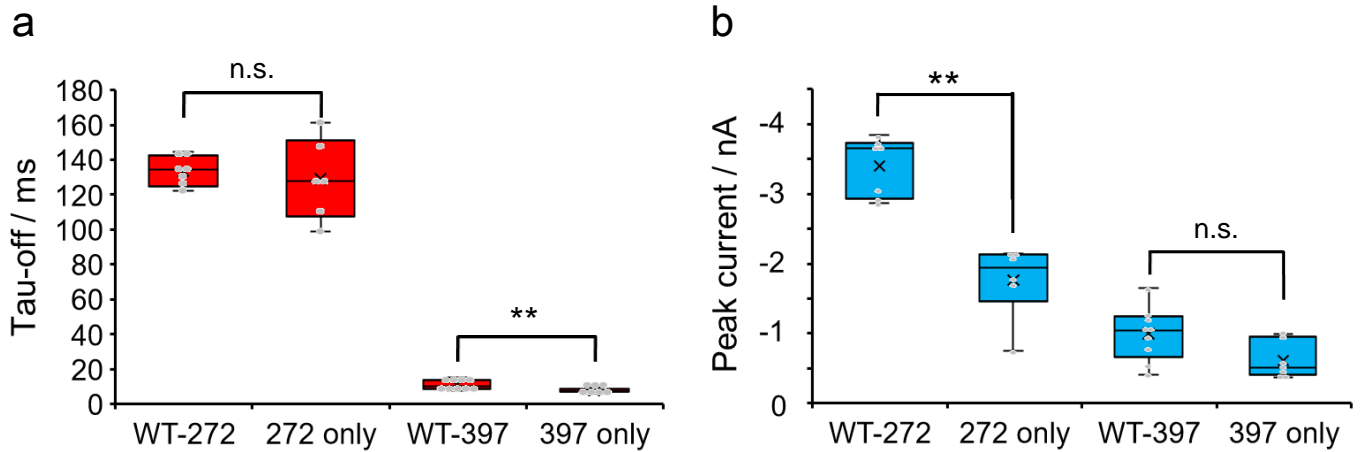

**Supplementary Figure 6. eYFP does not alter the channel kinetics of KnChR.** Photocurrent amplitudes at -70 mV were analyzed. Time constants (a) and peak current amplitude (b) of KnChR-272 amino acids and -397 amino acids variants with or without eYFP. Standard solutions were used. Data were presented as the mean  $\pm$  SEM.  $N=7$  (WT-272), 6 (272 only), 9 (WT-397), and 7 (397 only).

a KnChR

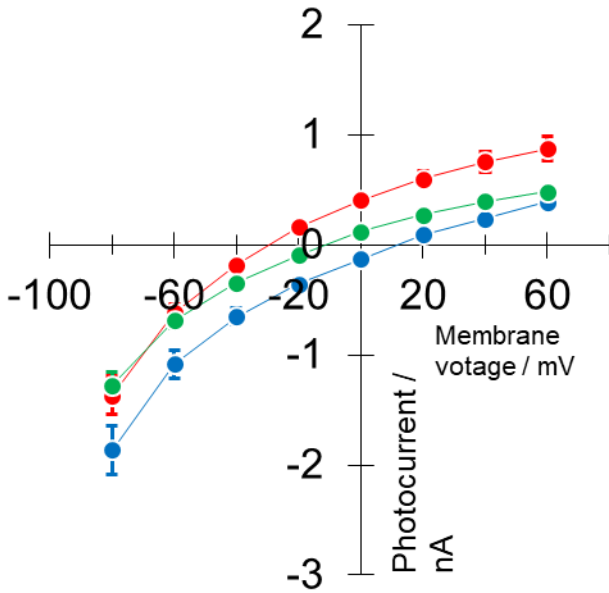

b CrChR2

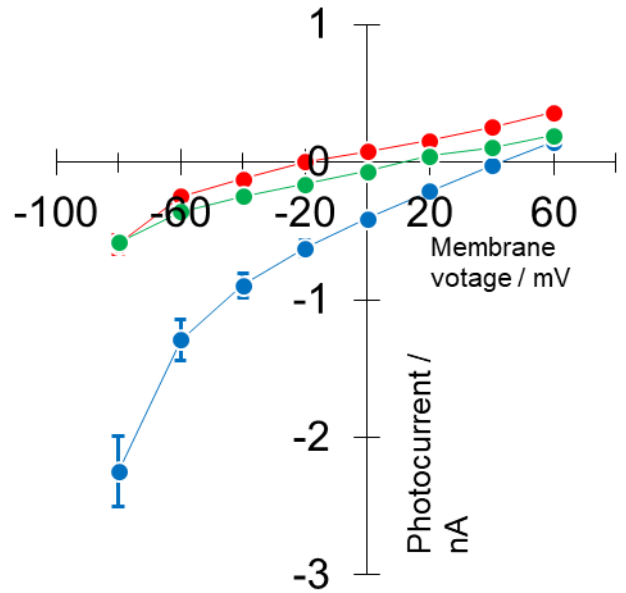

**Supplementary Figure 7. I-V relationship of KnChR (a) and CrChR2 (b) in various bath solutions.** Red: NMG pH9.0, Blue: K<sup>+</sup> pH9.0, Green: Mg<sup>2+</sup> pH9.0. See Supplementary Table 4 for more details of solutions. Data were presented as the mean  $\pm$  SEM.  $N=5$  (all the conditions for KnChR).  $N=8$  (CrChR2 in NMG pH 9.0), 5 (CrChR2 in K<sup>+</sup> pH 9.0), and 6 (CrChR2 in Mg<sup>2+</sup> pH 9.0).



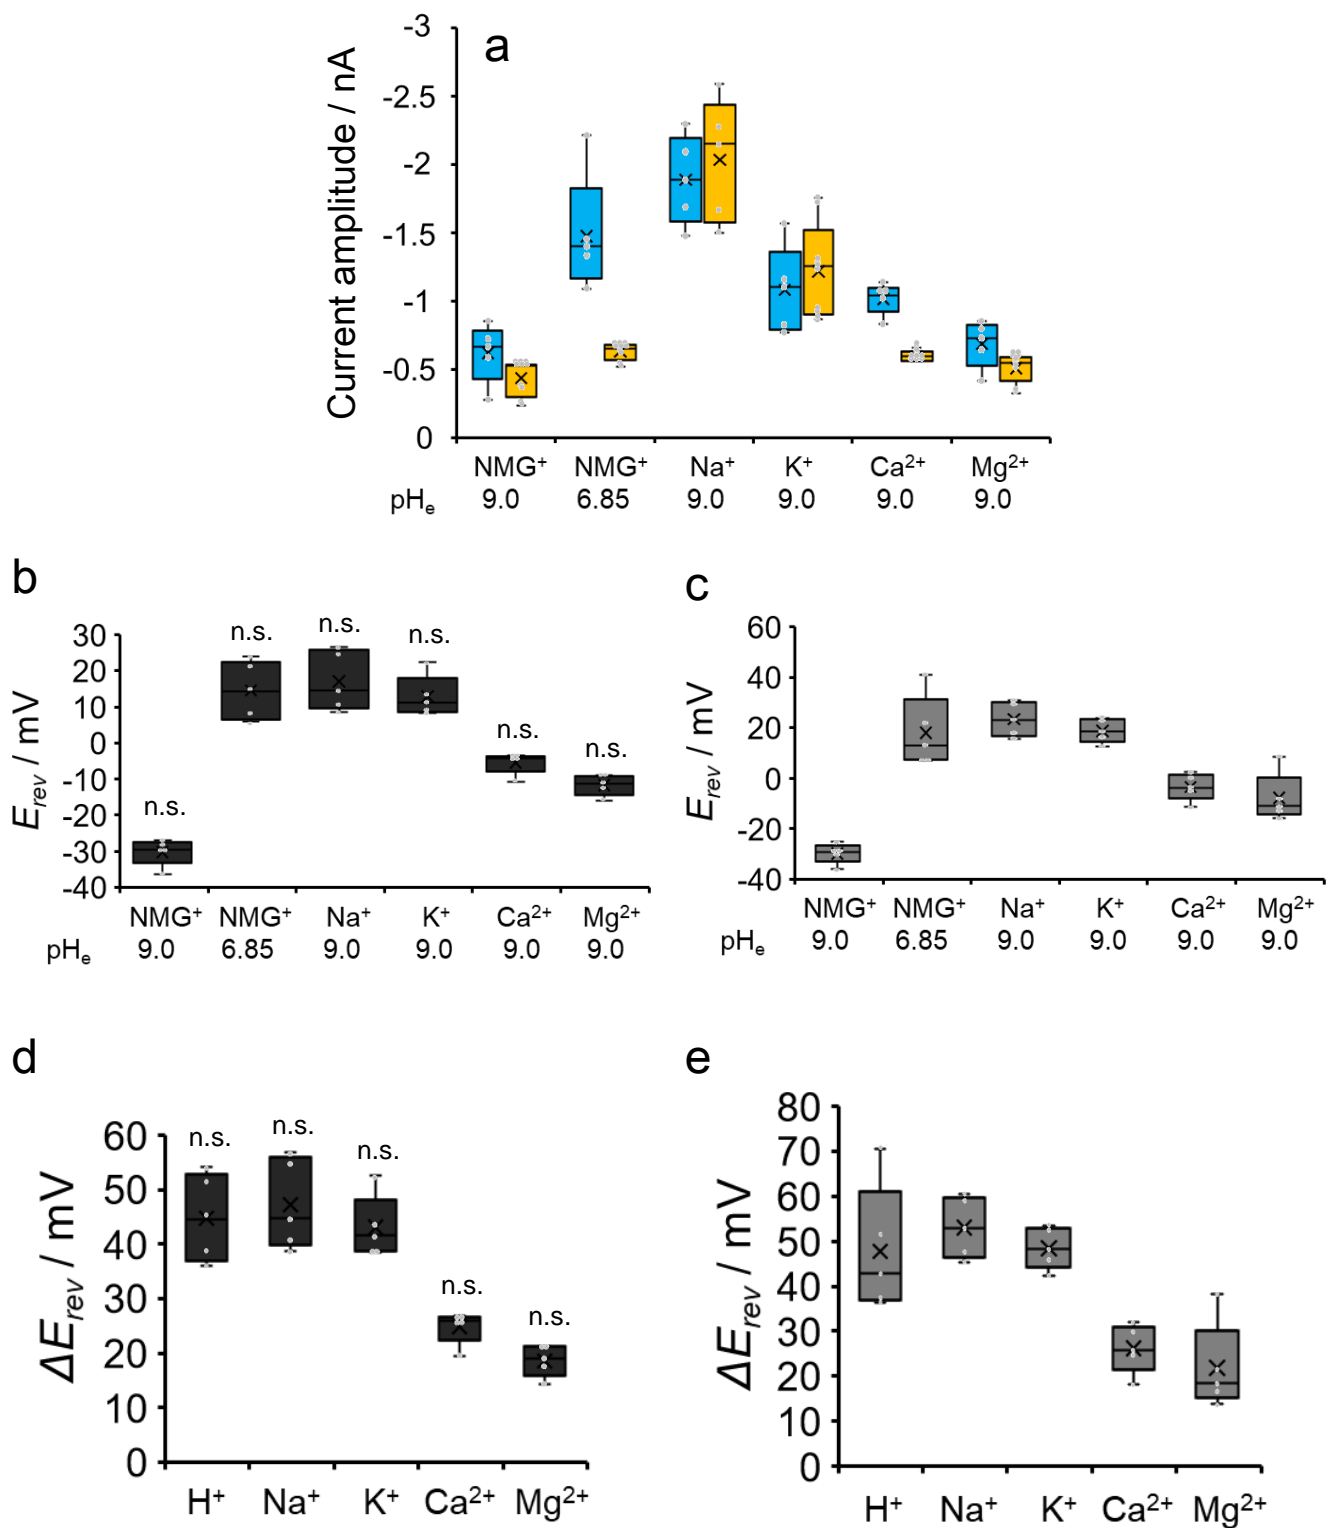

**Supplementary Figure 8. Ion selectivity of KnChR.** Peak and steady-state component of photocurrents were analyzed. **a**, Photocurrent amplitude at -60 mV under various ionic conditions. blue, peak component. orange, steady-state component. Reversal potential ( $E_{rev}$ ) of peak component (**b**) and steady-state component (**c**). Shift of  $E_{rev}$ ,  $\Delta E_{rev}$  analyzed from peak component (**d**) and from steady-state component (**e**). The Mann-Whitney  $U$  test was performed between **b** and **c**, and **d** and **e**. No significant difference was observed between **b** and **c**, and **d** and **e** respectively. Data were presented as the mean  $\pm$  SEM with  $N=5$ .

## a Predicted Site:

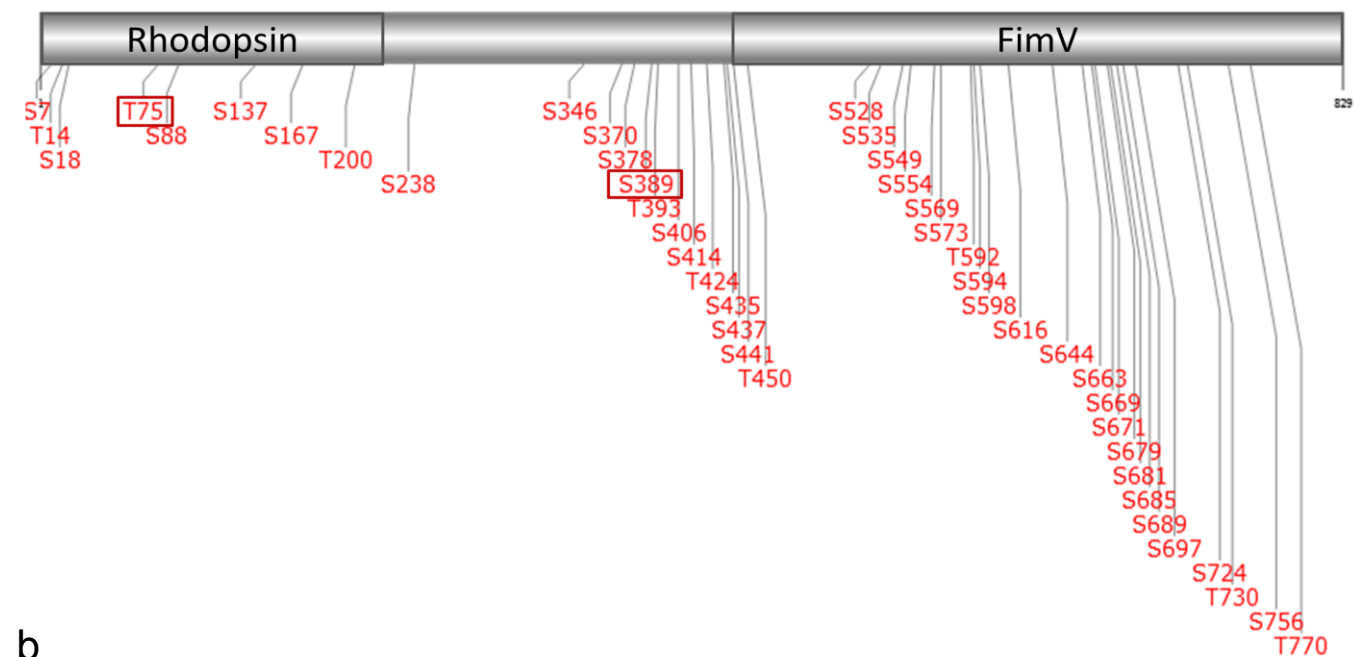

## b

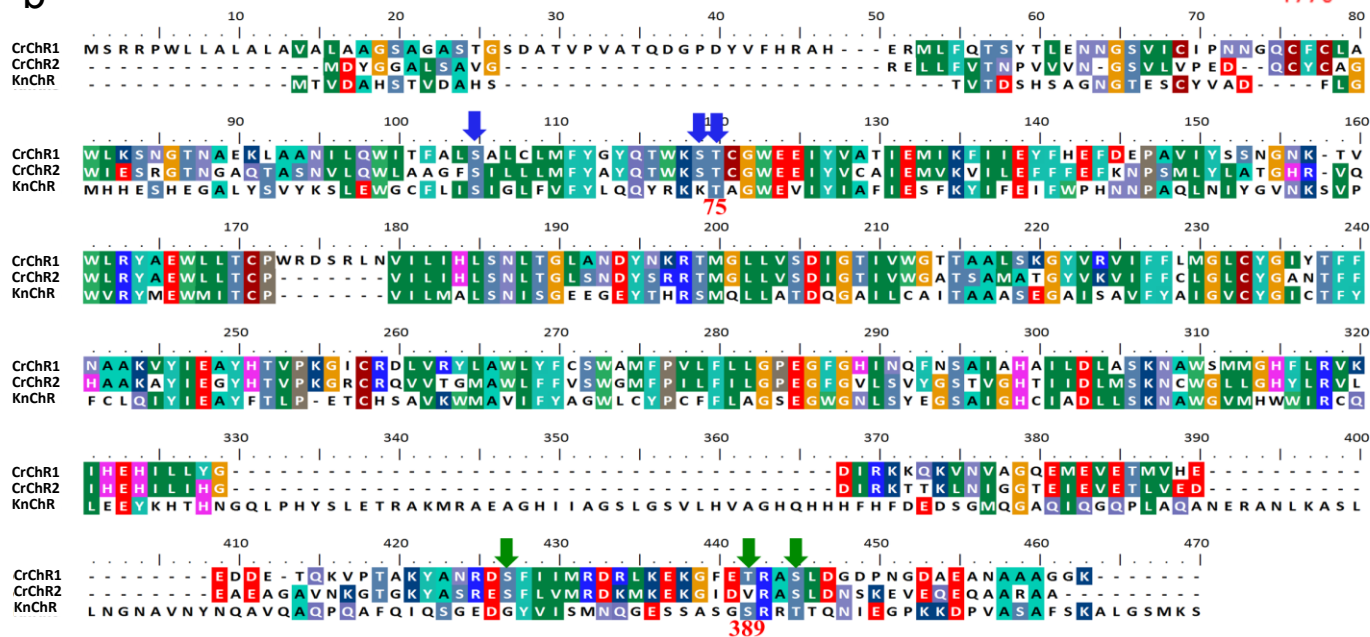

**Supplementary Figure 9. Prediction of phosphorylation site in KnChR** (a) Prediction of kinase-specific phosphorylation site by GPS 5.0 database. T75 and S389 highlighted in red box correspond to Ser102 and Thr373 in CrChR1 phosphorylation site proposed by Böhm et al. (2019) and Wagner et al. (2008), respectively. (b) Proposed phosphorylation sites in CrChR1; Böhm et al. (2019) suggested multiple phosphorylation sites, one of them (Ser102) being in the first transmembrane domain (TM) and two (Ser 116 and Thr117) in the intracellular vestibule between (TM) domains marked by a blue arrow. One of them (Thr117) was conserved in KnChR (T75 marked by a red number below the sequence). Wagner et al. (2008) proposed three phosphorylation sites (Ser358, Thr373 and Ser376) in CrChR1 and one in CrChR2 (Ser358) marked by a green arrow. Out of three phosphorylation sites, one is common among CrChR1 and CrChR2 (RD/ESpF) but replaced by Gly in KnChR. Ser389 corresponding to Thr373 is marked by a red number (389) below the sequence.

**Supplementary Table 1 Solutions for the ion selectivity measurement**

|                |                        | NaCl | KCl | CaCl <sub>2</sub> | MgCl <sub>2</sub> | NMG | EGTA | CHES | MES |
|----------------|------------------------|------|-----|-------------------|-------------------|-----|------|------|-----|
| <b>Pipette</b> | NMG pH9.0              | 1    | 1   | 2                 | 2                 | 140 | 10   | 10   | -   |
| <b>Bath</b>    | NMG pH9.0              | 1    | 1   | 2                 | 2                 | 140 | -    | 10   | -   |
|                | NMG pH6.85             | 1    | 1   | 2                 | 2                 | 140 | -    | -    | 10  |
|                | Na <sup>+</sup> pH9.0  | 140  | 1   | 2                 | 2                 | -   | -    | 10   | -   |
|                | K <sup>+</sup> pH9.0   | 1    | 140 | 2                 | 2                 | -   | -    | 10   | -   |
|                | Ca <sup>2+</sup> pH9.0 | 1    | 1   | 70                | 2                 | -   | -    | 10   | -   |
|                | Mg <sup>2+</sup> pH9.0 | 1    | 1   | 2                 | 70                | -   | -    | 10   | -   |

**Supplementary Table 2 List of primers used for insertions**

| Gene           | Sense primers                          | Anti-sense primers                      |
|----------------|----------------------------------------|-----------------------------------------|
| KnChR_cMyc     | TCAGAAGAGGATCTGGGGGA<br>TCCAAAGAGC     | GATGAGTTTTTGTTCGCTGGC<br>GCTCACAGG      |
| KnChR_272_stop | GTTGGAAGAATACAAGTAAGG<br>GGATCCAAAGAGC | GCTCTTTGGATCCCCTTACTT<br>GTATTCTTCCAAC  |
| KnChR_397_stop | CAACACAGAACATCGAGTAAG<br>GGATCCAAAGAGC | GCTCTTTGGATCCCCTTACTC<br>GATGTTCTGTGTTG |

**Supplementary Table 3 List of primers used for subcloning into an eYFP-3.0 vector**

| Gene            | Sense primers                             | Anti-sense primers                       |
|-----------------|-------------------------------------------|------------------------------------------|
| KnChR_272 aa    | TTCGAATTCGCCACCGCTAGC<br>ATTATGACAGTGGATG | GCTCTTTGGATCCCCCTTGTA<br>TTCTTCCAAGTGGC  |
| KnChR_280 aa    | TTCGAATTCGCCACCGCTAGC<br>ATTATGACAGTGGATG | GCTCTTTGGATCCCCCTGGCAA<br>CTGTCCGTTATGAG |
| KnChR_290 aa    | TTCGAATTCGCCACCGCTAGC<br>ATTATGACAGTGGATG | GCTCTTTGGATCCCCCATTTT<br>GGCTCTTGTCTCAAG |
| KnChR_300 aa    | TTCGAATTCGCCACCGCTAGC<br>ATTATGACAGTGGATG | GCTCTTTGGATCCCCGCCAGC<br>AATAATATGCCAG   |
| KnChR_310 aa    | TTCGAATTCGCCACCGCTAGC<br>ATTATGACAGTGGATG | GCTCTTTGGATCCCCGCCAGC<br>CACGTGCAAGACGC  |
| KnChR_317 aa    | TTCGAATTCGCCACCGCTAGC<br>ATTATGACAGTGGATG | GCTCTTTGGATCCCCGTGAAA<br>ATGATGATGCTGATG |
| KnChR_321 aa    | TTCGAATTCGCCACCGCTAGC<br>ATTATGACAGTGGATG | GCTCTTTGGATCCCCATCCTC<br>ATCAAAGTGAAAATG |
| KnChR_397 aa    | TTCGAATTCGCCACCGCTAGC<br>ATTATGACAGTGGATG | GCTCTTTGGATCCCCCTCGAT<br>GTTCTGTGTTGTCC  |
| KnChR_697 aa    | TTCGAATTCGCCACCGCTAGC<br>ATTATGACAGTGGATG | GCTCTTTGGATCCCCGCTGGC<br>GCTCACAGGGGCC   |
| eYFP 3.0 vector | GGGGATCCAAAGAGCAGGAT                      | GGTGGCGAATTCGAAGCTTG                     |

**Supplementary Table 4 List of primers used for site-directed mutagenesis**

| Mutations       | Sense primers                                    | Anti-sense primers                           |
|-----------------|--------------------------------------------------|----------------------------------------------|
| KnChR_397_E285A | GCCACACTATAGCCTTGCGA<br>CAAGAGCCAAAATGA          | TCATTTTGGCTCTTGTGCGA<br>AGGCTATAGTGTGGC      |
| KnChR_397_R287A | GTTGCCACACTATAGCCTTG<br>AGACAGCAGCCAAAATGAG<br>G | CCTCATTTTGGCTGCTGTCT<br>CAAGGCTATAGTGTGGCAAC |
| KnChR_397_K289A | GCCTTGAGACAAGAGCCGC<br>AATGAGGGCTGAAGCTG         | CAGCTTCAGCCCTCATTGCG<br>GCTCTTGTCTCAAGGC     |
| KnChR_397_R291A | GAGACAAGAGCCAAAATGG<br>CGGCTGAAGCTGGGCATA        | TATGCCCAGCTTCAGCCGCC<br>ATTTTGGCTCTTGTCTC    |
| KnChR_397_E293A | AGCCAAAATGAGGGCTGCA<br>GCTGGGCATATTATTG          | CAATAATATGCCCAGCTGCA<br>GCCCTCATTTTGGCT      |
